# Supplementary material
Source: PubMed Central journal article supplement (PMC6755788)
Supplement: supp_RA118.005263_139976_3_supp_368461_pv64rp.pdf [file supp_RA118.005263_139976_3_supp_368461_pv64rp.pdf]

Supporting Information

**CNS cell-type specific gene profiling of P301S tau transgenic mice identifies genes dysregulated by progressive tau accumulation**

Yazi D. Ke, Gabriella Chan, Kristie Stefanoska, Carol Au, Mian Bi, Julius Müller, Magdalena Przybyla, Astrid Feiten, Emmanuel Prikas, Glenda M. Halliday, Olivier Piguet, Matthew C. Kiernan, Michael Kassiou, John R Hodges, Clement T. Loy, John S. Mattick, Arne Ittner, Jillian J. Kril, Greg Sutherland, Lars M. Ittner

List of material included:

Supporting Tables S1-2

Supporting Figures S1-8

## Supporting Tables

**Table S1** Differentially regulated genes in young and old TAU58/2 mice. Note that the differentially regulated genes from young and old TAU58/2 mice compared to the respective wild-type littermates are listed in individual tabs in the Excel table.

**Table S2** MouseNetV2-predicted genes related to differentially regulated guide genes from young and old TAU58/2 mice. Note that the genes from young and old TAU58/2 mice are listed in individual tabs in the Excel table.

## Supporting Figures

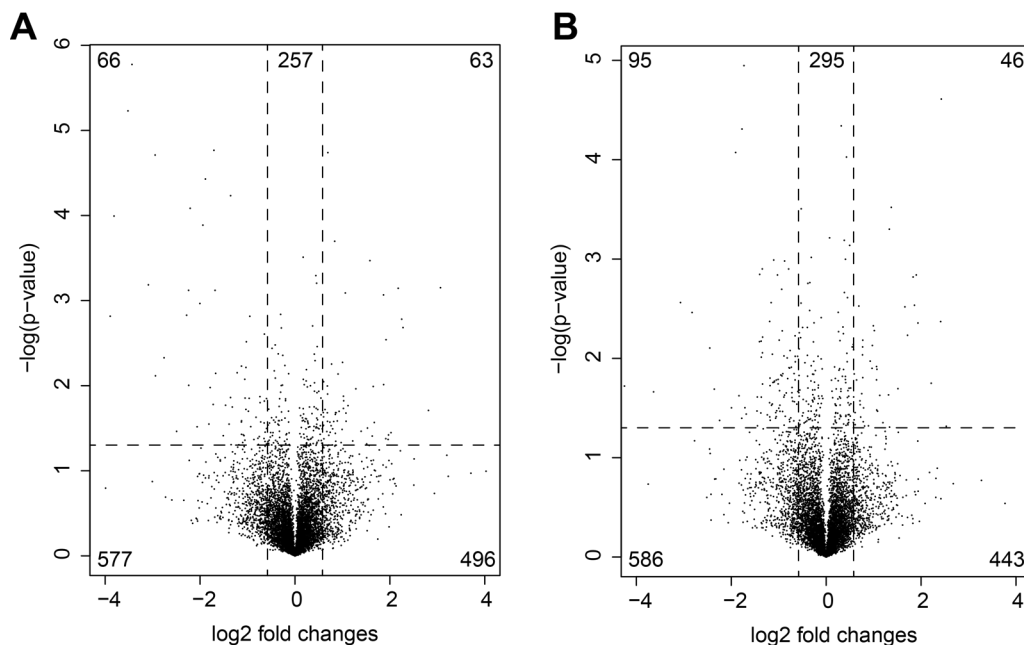

**Figure S1** Cluster analysis and volcano blots of genes from young and old TAU58/2 mice.

**(A)** RNA sequencing of young TAU58/2 mice relative to non-transgenic littermate controls; Horizontal broken line indicates p-value of 0.05. Vertical broken lines indicated 50% down- (left) and up-regulation (right). Numbers of genes in gates areas are indicated. Note that for subsequent analysis all genes with differential expression  $>|50\%$  were included.

**(B)** RNA sequencing of old TAU58/2 mice relative to non-transgenic littermate controls; Horizontal broken line indicates p-value of 0.05. Vertical broken lines indicated 50% down- (left) and up-regulation (right). Numbers of genes in gates areas are indicated. Note that for subsequent analysis all genes with differential expression  $>|50\%$  were included.

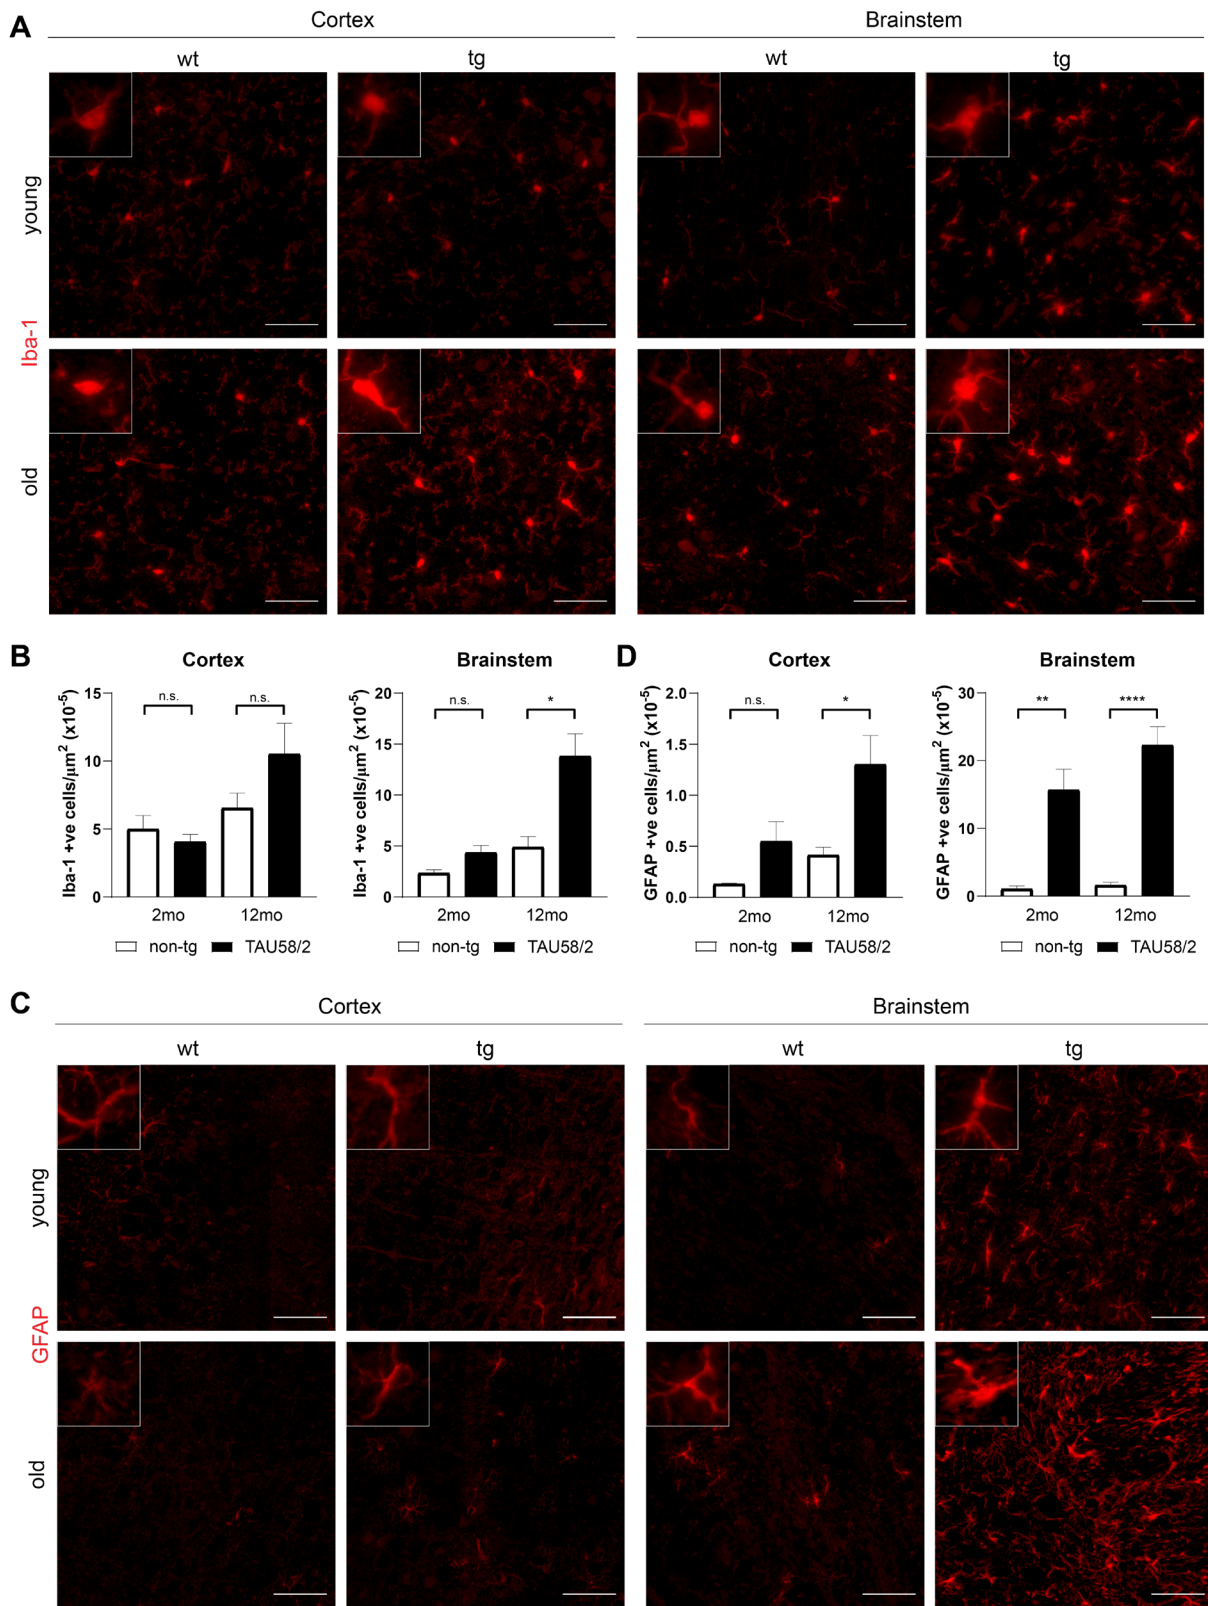

**Figure S2** Microgliosis and astrocytosis in TAU58/2 mice.

(A) Staining of young and old TAU58/2 and non-transgenic (non-tg) control brains with antibodies to microglial Iba1 (red). Representative images of cortex and brainstem are shown. Insets show higher resolution images of microglia. Scale bar, 50 $\mu$ m.

(B) Quantification of numbers of Iba1-positive microglia in cortex and brainstem of young and old TAU58/2 and non-transgenic (non-tg) control brains (tg: n=4-5, wt: n=3-4; \*, p<0.05; Student's *t*-test).

(C) Staining of young and old TAU58/2 and non-transgenic (non-tg) control brains with antibodies to astrocytic Gfap (red). Representative images of cortex and brainstem are shown. Insets show higher resolution images of astrocytes. Scale bar, 50 $\mu$ m.

(D) Quantification of numbers of Gfap-positive astrocytes in cortex and brainstem of young and old TAU58/2 and non-transgenic (non-tg) control brains (tg: n=4-5, wt: n=3-4; \*\*, p<0.01, \*\*\*, p<0.0001; Student's *t*-test).

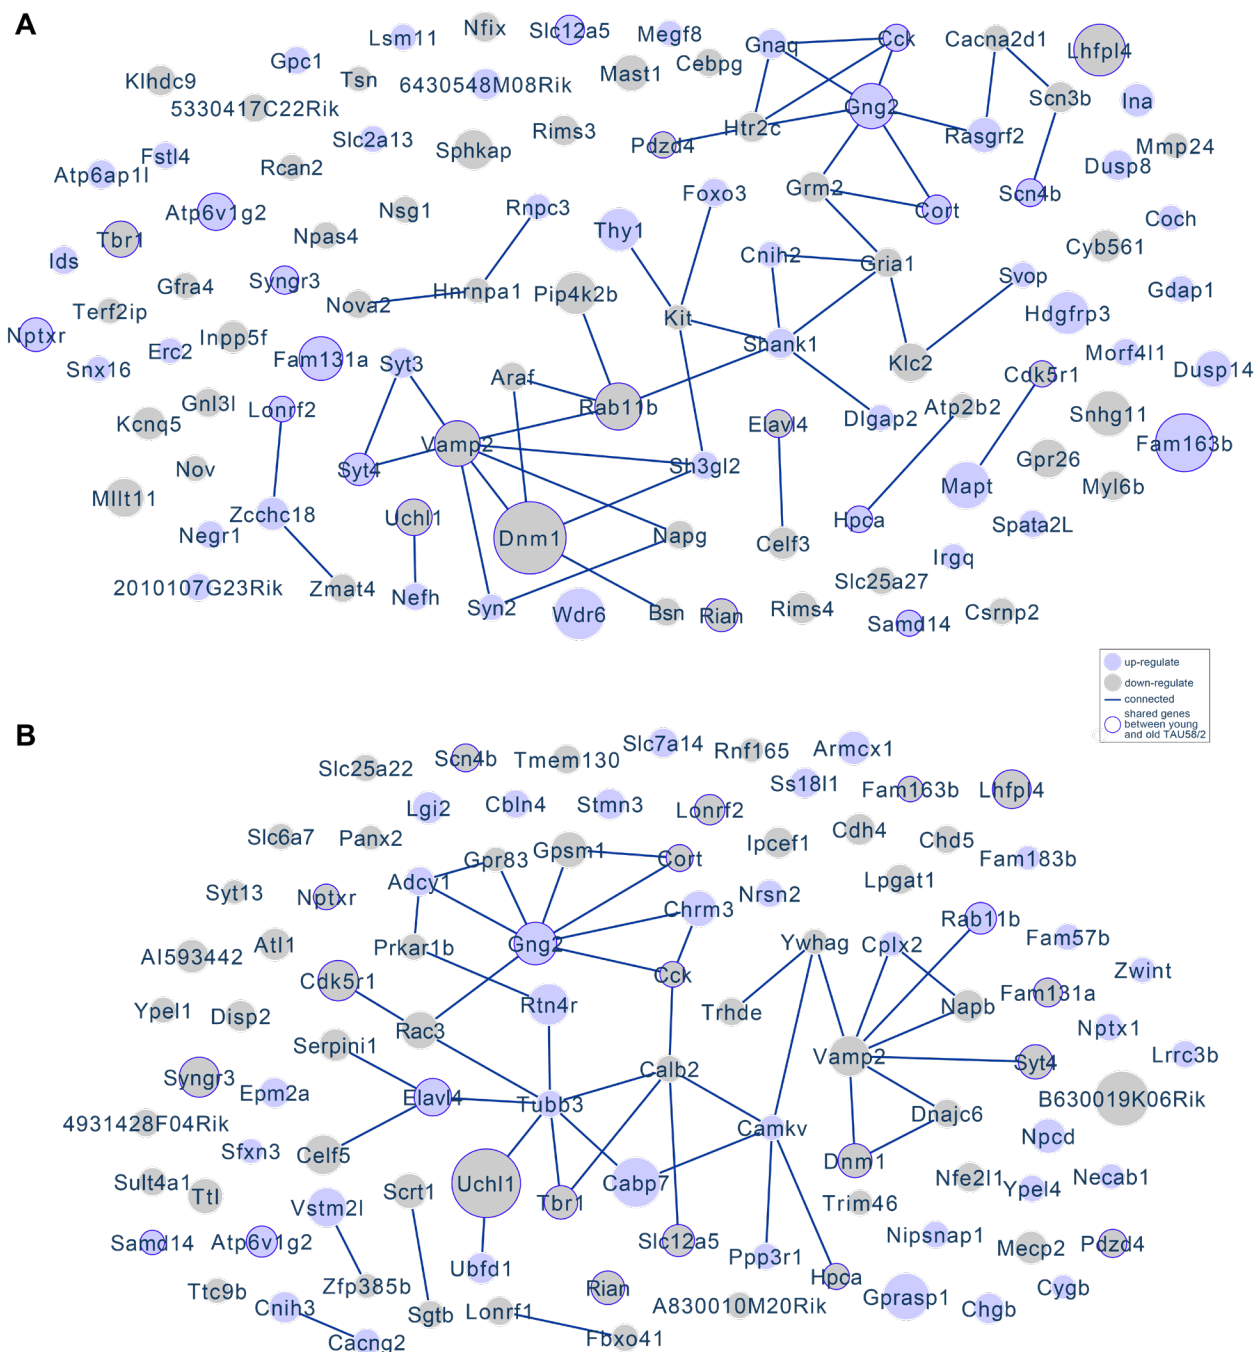

**Figure S3** STRING analysis of differentially regulated genes annotated to neurons in young and old TAU58/2 mice.

(A) Complete predicted networks of differentially expressed genes annotated to neurons in young TAU58/2 mice. Light blue filled circles indicate up-regulated genes, while light grey filled circles indicate down-regulated genes. Size of filled circles indicate the relative degree of deregulation (large=highly deregulated and small=moderate deregulation as compared to gene expression in

non-transgenic controls). Dark blue borders indicate deregulation in both young and old TAU58/2 mice. Lines indicate the connection predicted by STRING analysis.

**(B)** Complete predicted networks of differentially expressed genes annotated to neurons in old TAU58/2 mice.

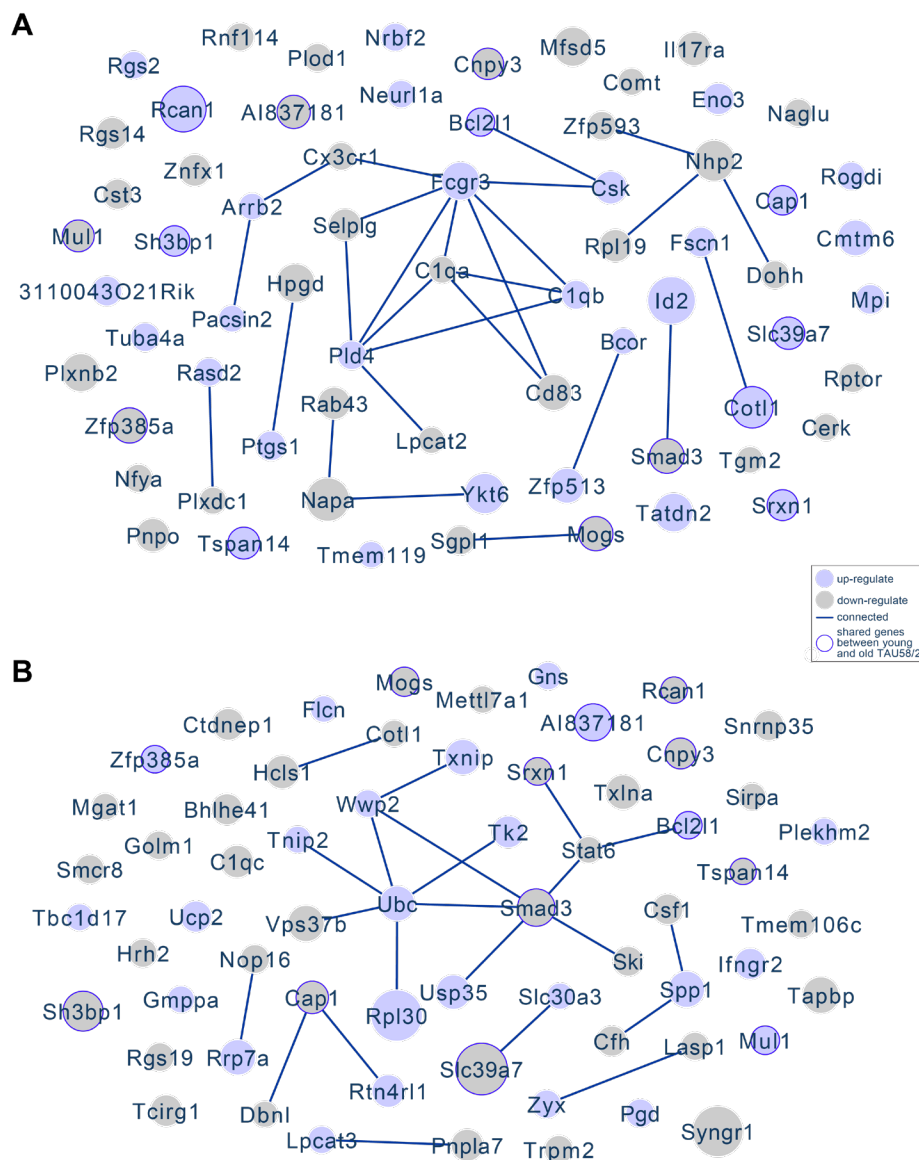

**Figure S4** STRING analysis of differentially regulated genes annotated to microglia in young and old TAU58/2 mice.

**(A)** Complete predicted networks of differentially expressed genes annotated to microglia in young TAU58/2 mice. Light blue filled circles indicate up-regulated genes, while light grey filled circles indicate down-regulated genes. Size of filled circles indicate the relative degree of deregulation (large=highly deregulated and small=moderate deregulation as compared to gene expression in non-transgenic controls). Dark blue borders indicate deregulation in both young and old TAU58/2 mice. Lines indicate the connection predicted by STRING analysis.

**(B)** Complete predicted networks of differentially expressed genes annotated to microglia in old TAU58/2 mice.



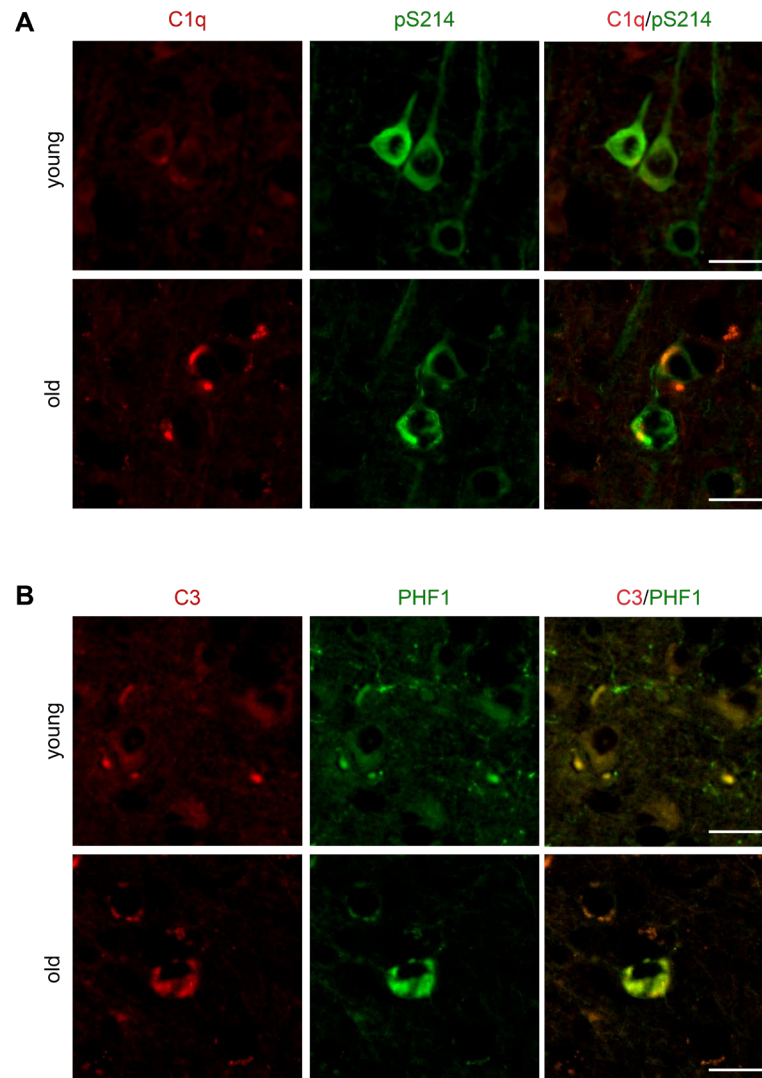

**Figure S5** Complement activation and accumulation in phosphorylated tau-harboring neurons in brains of TAU58/2 mice.

(A) Staining of young and old TAU58/2 brains with antibodies to complement factor C1q (red) and phosphorylated tau (pS214). Scale bar, 50 $\mu$ m.

(B) Staining of young and old TAU58/2 brains with antibodies to complement factor C3 (red) and phosphorylated tau (PHF1). Scale bar, 50 $\mu$ m.

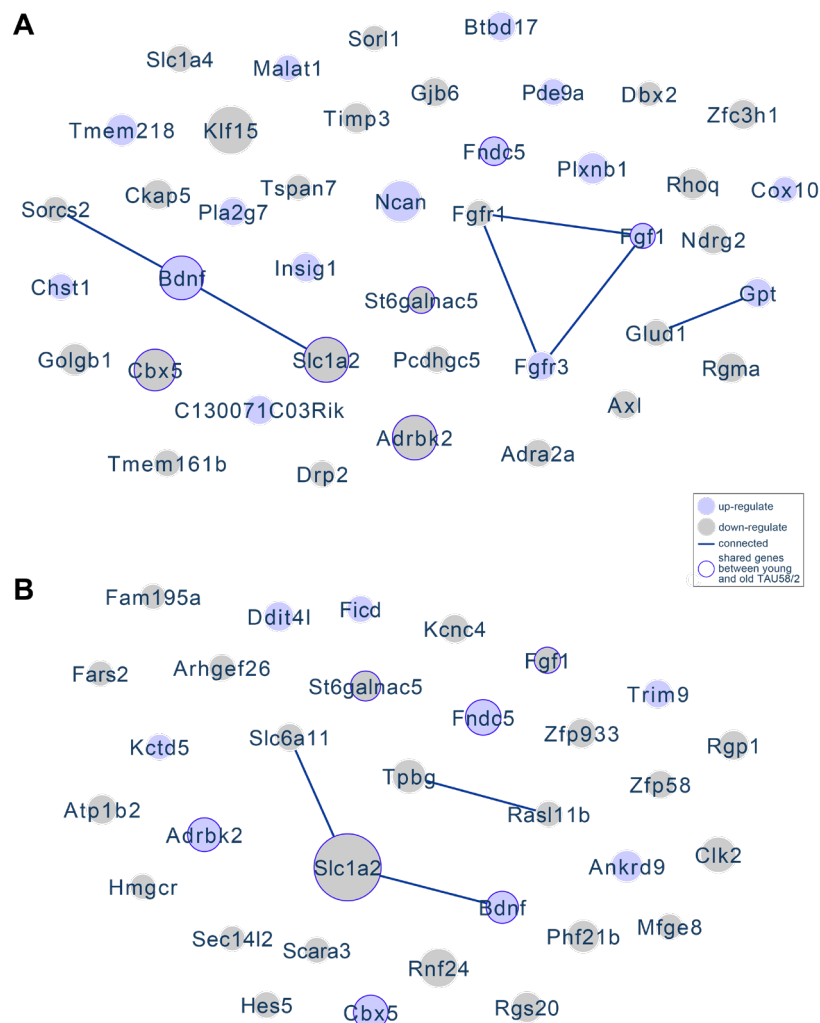

**Figure S6** STRING analysis of differentially regulated genes annotated to astrocytes in young and old TAU58/2 mice.

**(A)** Complete predicted networks of differentially expressed genes annotated to astrocytes in young TAU58/2 mice. Light blue filled circles indicate up-regulated genes, while light grey filled circles indicate down-regulated genes. Size of filled circles indicate the relative degree of deregulation (large=highly deregulated and small=moderate deregulation as compared to gene expression in non-transgenic controls). Dark blue borders indicate deregulation in both young and old TAU58/2 mice. Lines indicate the connection predicted by STRING analysis.

**(B)** Complete predicted networks of differentially expressed genes annotated to astrocytes in old TAU58/2 mice.

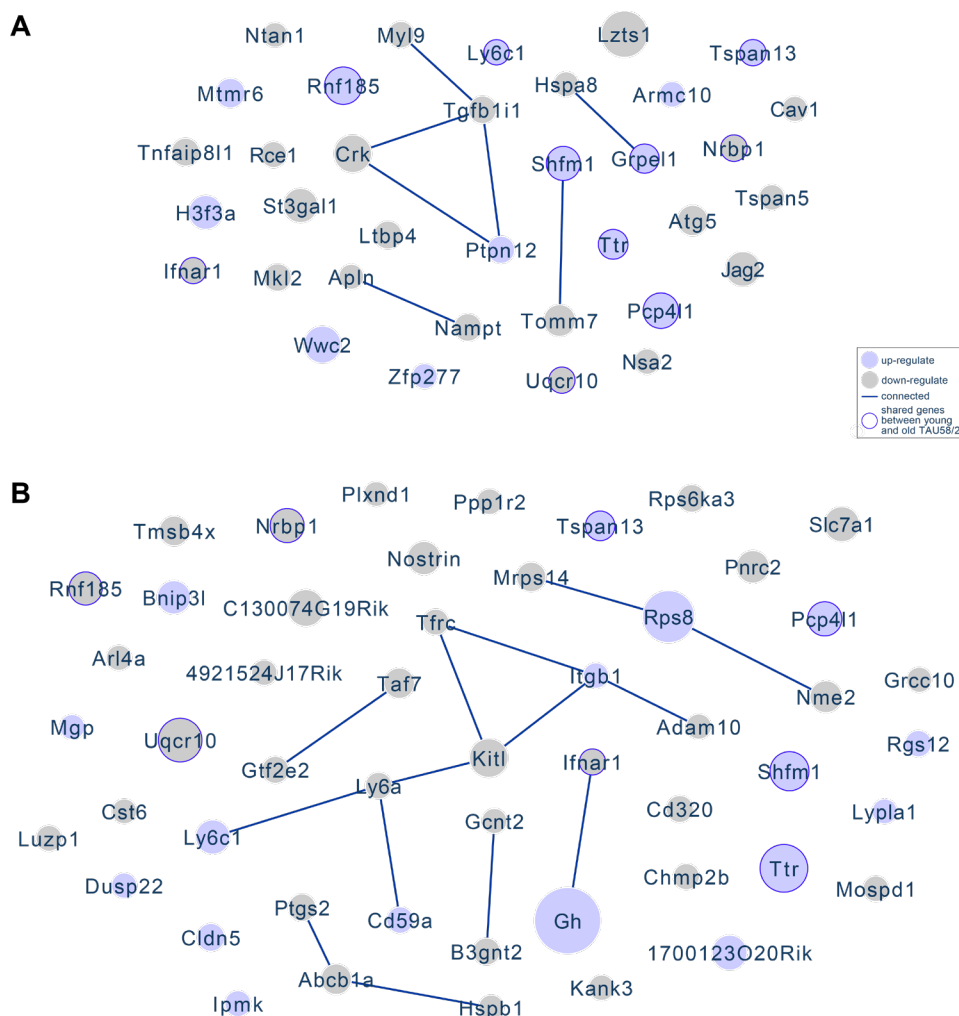

**Figure S7** STRING analysis of differentially regulated genes annotated to endothelial cells in young and old TAU58/2 mice.

**(A)** Complete predicted networks of differentially expressed genes annotated to endothelial cells in young TAU58/2 mice. Light blue filled circles indicate up-regulated genes, while light grey filled circles indicate down-regulated genes. Size of filled circles indicate the relative degree of deregulation (large=highly deregulated and small=moderate deregulation as compared to gene expression in non-transgenic controls). Dark blue borders indicate deregulation in both young and old TAU58/2 mice. Lines indicate the connection predicted by STRING analysis.

**(B)** Complete predicted networks of differentially expressed genes annotated to endothelial cells in old TAU58/2 mice.

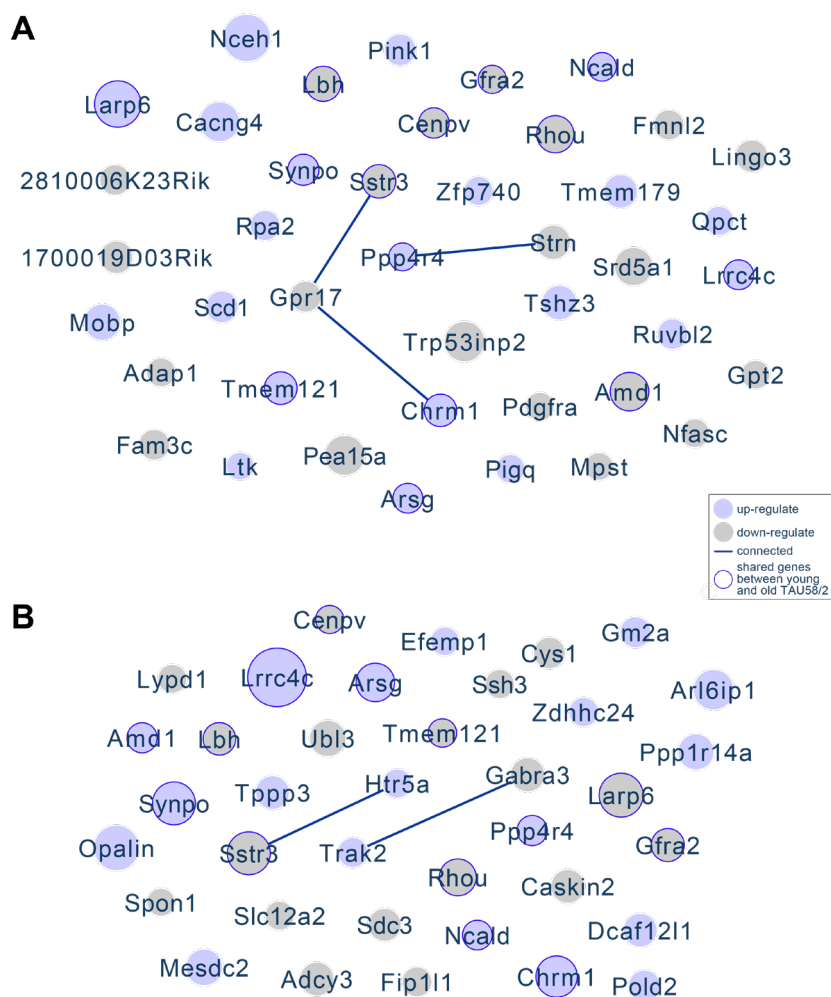

**Figure S8** STRING analysis of differentially regulated genes annotated to oligodendrocytes in young and old TAU58/2 mice.

**(A)** Complete predicted networks of differentially expressed genes annotated to oligodendrocytes in young TAU58/2 mice. Light blue filled circles indicate up-regulated genes, while light grey filled circles indicate down-regulated genes. Size of filled circles indicate relative degree of deregulation (large=highly deregulated and small=moderate deregulation as compared to gene expression in non-transgenic controls). Dark blue borders indicate deregulation in both young and old TAU58/2 mice. Lines indicate the connection predicted by STRING analysis.

**(B)** Complete predicted networks of differentially expressed genes annotated to oligodendrocytes in old TAU58/2 mice.
